# Supplementary material for: TALEN-Mediated Modification of the Bovine Genome for Large-Scale Production of Human Serum Albumin
Source: PLOS journal article supplement (doi:10.1371/journal.pone.0089631), 2014-02-21
Supplement: S1 (10.1371/journal.pone.0089631.s001) [file journal.pone.0089631.s001]

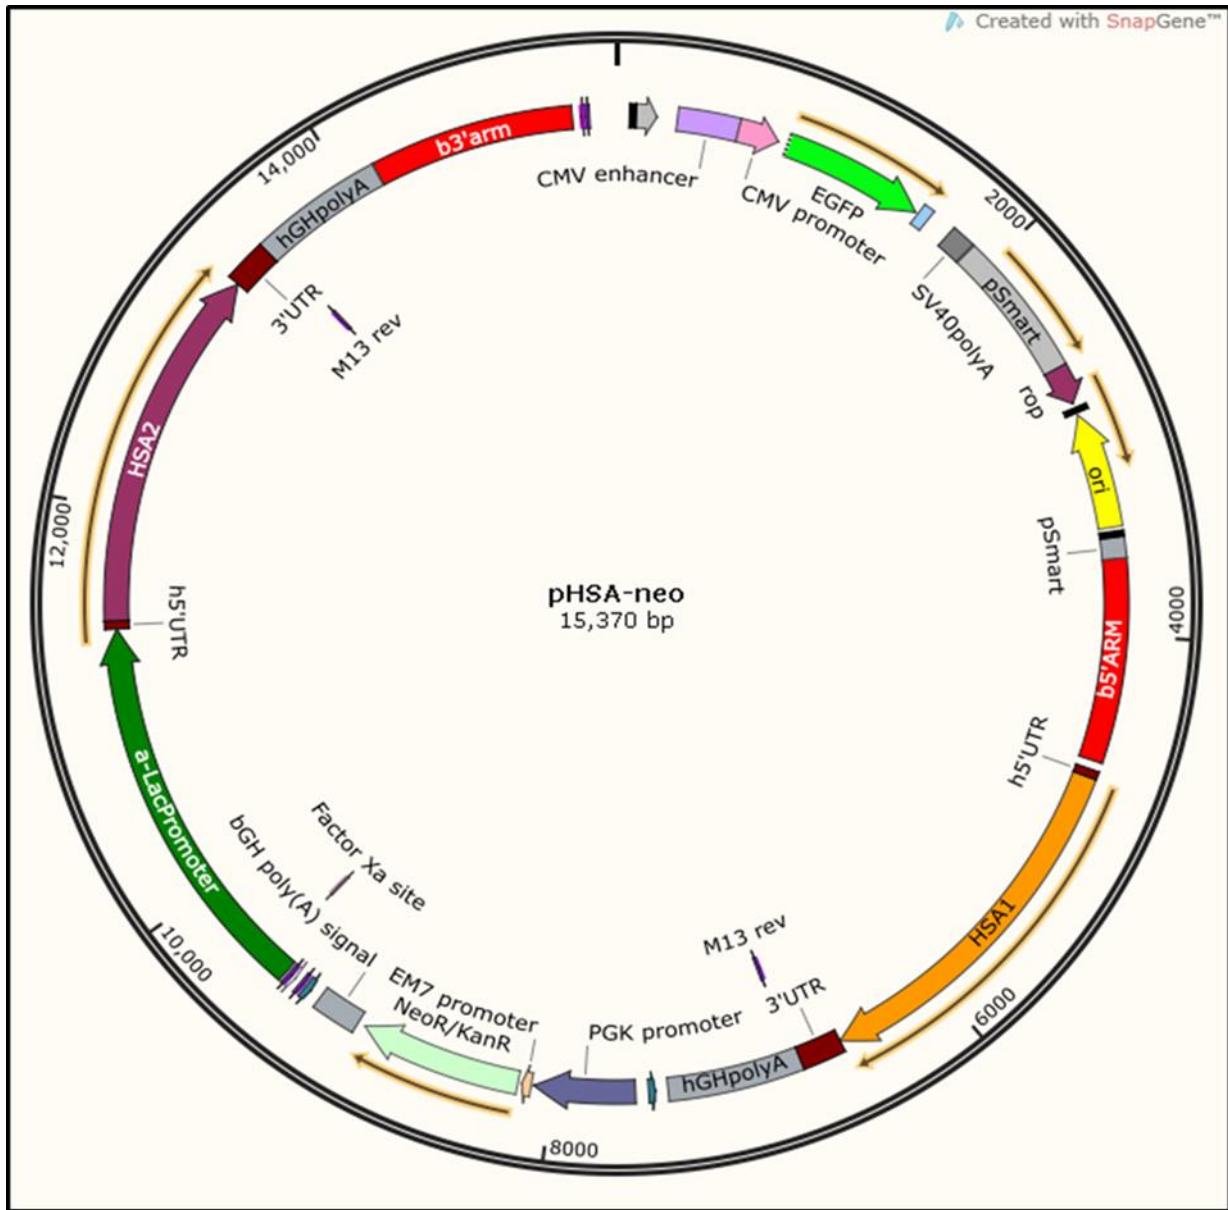

Figure S1. Plasmid map of the targeting construct, pHSA-neo.
