# Supplementary material for: TALEN-Mediated Modification of the Bovine Genome for Large-Scale Production of Human Serum Albumin
Source: PLOS journal article supplement (doi:10.1371/journal.pone.0089631), 2014-02-21
Supplement: S4 (10.1371/journal.pone.0089631.s004) [file journal.pone.0089631.s004]

**Table S1. SCNT results for targeted and wild-type (WT) 3142 bovine fibroblast donors.**  
One blastocyst from targeted cell line was not tested (NT).

| Nuclear Donor                                    | Targeted 3142 Fibroblasts | WT 3142 Fibroblasts |
|--------------------------------------------------|---------------------------|---------------------|
| Number fused/number attempted (%)                | 51/99 (51.5)              | 35/43 (81.4)        |
| Number developed to blastocyst (%)               | 5/51 (9.8)                | 1/35 (2.9)          |
| Number positive for pHSA-neo/number analyzed (%) | 2/4 (50)<br>1 NT          | 0/1 (0)             |
